# Supplementary material
Source: MDPI journal article supplement (https://www.mdpi.com/2311-7524/8/3/236)
Supplement: s1 [file s1]

## Genotype information

**Amfora**—Variety Amfora medium early kapia fruit type variety from the Institute of Field and Vegetable Crops, Novi Sad. Registered in Serbia 2001. Fruit is large, dark green at technological maturity, intensely red at physiological maturity. It is usually used for preparing vegetable spread (ajvar).

Danojević, D., Medić-Pap, S., Červenski, J.; Selection and heritability of F2 sweet pepper offspring from the cross Amfora × Piquillo de Lodosa. *Ratarstvo Povrtarstvo* **2018**, 2, 80–86.

**Una**—Medium early kapia fruit variety from the Institute of Field and Vegetable Crops, Novi Sad, Serbia. Registered in Serbia 1997. The fruit length is 14-18 cm, fruit width about 4 cm, fruit weight 80–120 g, and pericarp thickness about 5 mm. The fruit color is yellow-green in technological maturity, and intensely red in physiological maturity. The fruit is suitable for fresh consumption, as well as for pickling, and roasting.

**Matica**—Medium late variety with upright fruit from the Institute of Field and Vegetable Crops, Novi Sad, Serbia. Registered in Serbia 1988. Matica has conical fruit and light-yellow green fruit color. The fruit weight is 70-100 g and the pericarp thickness is 5–6 mm.

Danojević, D., Medić-Pap, S., Glogovac, S.; Fruit characteristics of new pepper variety “NS PRVA”. *Selekcija Semenarstvo* **2021**, 1, doi: 10.5937/SelSem2101001D

**California Wonder**—Late variety, bell pepper fruit type. The fruit color is dark green in technological maturity, and intensely red in physiological maturity. Fruit weight 100-140 g and pericarp thickness about 5 mm.
